# Supplementary material
Source: PubMed Central journal article supplement (PMC4640329)
Supplement: jcbfm2015141x1.pdf [file jcbfm2015141x1.pdf]

Supplementary Video. **Vasodilation in response to afferent stimulation without endfoot  $\text{Ca}^{2+}$  transients.** Low intensity (1.5V, 50Hz), short (1s) afferent stimulation with neuropil and neuronal  $\text{Ca}^{2+}$  transients but no astrocyte somata or endfoot  $\text{Ca}^{2+}$  signals preceding vasodilation. A small, localized endfoot transient can be seen but it occurs 40s after dilation onset. Vascular lumen (green); Rhod-2/AM  $\text{Ca}^{2+}$  indicator (white). Video speed is 50x of real-time events. The movie refreshes at peak dilation and repeats three times.

Supplementary Figure. High intensity afferent neuronal stimulation in the presence of the kinetically fast, high-affinity  $\text{Ca}^{2+}$  indicator OGB-1/AM ( $K_d \approx 200\text{nM}$ ) reveals the same threshold effect for astrocytic  $\text{Ca}^{2+}$  signals as other synthetic and genetic  $\text{Ca}^{2+}$  indicators tested. **A:** Higher voltages (supra-threshold) of brief (1s), high frequency (50Hz) electrical stimulation evoked  $\text{Ca}^{2+}$  transients in all neuronal elements and in astrocyte somata and endfeet. **B:** Averaged stimulus-evoked arteriolar dilation to supra-threshold voltages, and the summary of peak dilations. **C:**  $\text{Ca}^{2+}$  signals from endfeet and surrounding neuropil (n=4) during supra-threshold stimulation, imaged at 31.25Hz (32msec frame rate) detected a fast neuropil signal starting <32msec after the onset of stimulation (blue trace). The same stimulation evoked a rapid (32-64msec latency) and a delayed (2.9s latency)  $\text{Ca}^{2+}$  transient in the endfeet (green trace). The rapid  $\text{Ca}^{2+}$  signal was only detected in 1 of 4 cases, where a  $\text{Ca}^{2+}$  signal in the center of the arteriole lumen could also be detected (inset red trace), indicating leakage of signal from out-of-plane structures.

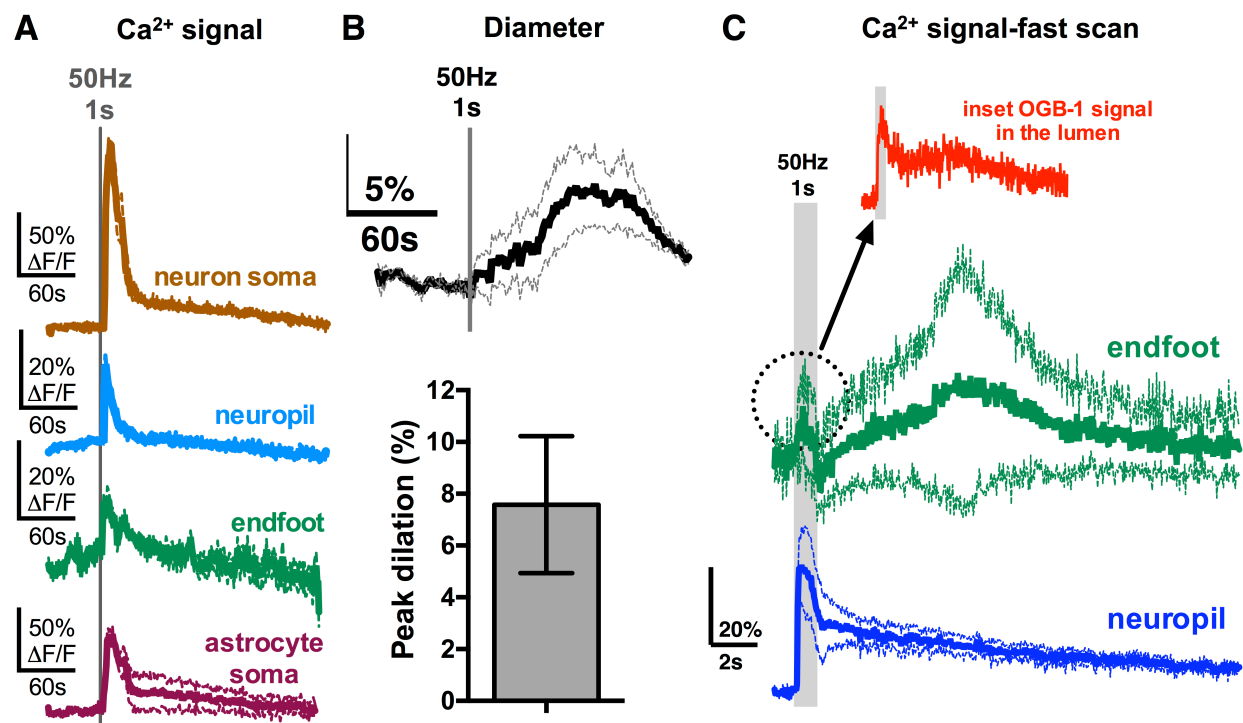

Supplementary Figure
